1 **Dietary diversity and the risk of metabolic syndrome in a Japanese population: An**  
2 **analysis of baseline cross-sectional data from the J-MICC study**

3

4 Zin Wai Htay<sup>1,2</sup>, Nobuaki Michihata<sup>1</sup>, Yohko Nakamura<sup>1</sup>, Yoshitaka Hippo<sup>1</sup>, Jun Otonari<sup>3</sup>,  
5 Hiroaki Ikezaki<sup>4,5</sup>, Yuichiro Nishida<sup>6</sup>, Chisato Shimanoe<sup>7</sup>, Takashi Tamura<sup>8</sup>, Mako  
6 Nagayoshi<sup>8</sup>, Yasufumi Kato<sup>8</sup>, Yudai Tamada<sup>8</sup>, Asahi Hishida<sup>9</sup>, Shiroh Tanoue<sup>10</sup>, Daisaku  
7 Nishimoto<sup>10,11</sup>, Teruhide Koyama<sup>12</sup>, Etsuko Ozaki<sup>12</sup>, Kiyonori Kuriki<sup>13</sup>, Naoyuki  
8 Takashima,<sup>14,15</sup> Naoko Miyagawa<sup>16,17</sup>, Sakurako Katsuura-Kamano<sup>18</sup>, Takeshi Watanabe<sup>18</sup>,  
9 Kenji Wakai<sup>8</sup>, Keitaro Matsuo<sup>19,20</sup>

10

11 <sup>1</sup> Cancer Prevention Center, Chiba Cancer Center Research Institute, 666-2 Nitona-cho,  
12 Chuo-ku, Chiba, 260-8717, Japan.

13 <sup>2</sup> Department of Global Health Policy, Graduate School of Medicine, The University of  
14 Tokyo, 7-3-1 Hongo, Bunkyo-ku, Tokyo, 113-0033, Japan

15 <sup>3</sup> Department of Psychosomatic Medicine Graduate School of Medical Sciences, Kyushu  
16 University, 3-1-1 Maidashi, Higashi-ku, Fukuoka, 812-8582, Japan

17 <sup>4</sup> Department of Comprehensive General Internal Medicine, Kyushu University Faculty of  
18 Medical Sciences, 3-1-1 Maidashi, Higashi-ku, Fukuoka, 812-8582, Japan

19 <sup>5</sup> Department of General Internal Medicine, Kyushu University Hospital, 3-1-1 Maidashi,  
20 Higashi-ku, Fukuoka, 812-8582, Japan

21 <sup>6</sup> Department of Preventive Medicine, Faculty of Medicine, Saga University, 5-1-1  
22 Nabeshima, Saga, 849-8501, Japan.

23 <sup>7</sup> Department of Pharmacy, Saga University Hospital, 5-1-1 Nabeshima, Saga, 849-8501,  
24 Japan.

NOTE: This preprint reports new research that has not been certified by peer review and should not be used to guide clinical practice.

- 25 <sup>8</sup> Department of Preventive Medicine, Nagoya University Graduate School of Medicine, 65  
26 Tsurumai-cho, Showa-ku, Nagoya, Aichi, 466-8550, Japan.
- 27 <sup>9</sup> Department of Public Health, Aichi Medical University, 1-1 Yasago Karimata. Nagakute,  
28 Aichi, 480-1103, Japan
- 29 <sup>10</sup> Department of Epidemiology and Preventive Medicine, Kagoshima University Graduate  
30 School of Medical and Dental Sciences, 8-35-1, Sakuragaoka, Kagoshima, 890-8544, Japan.
- 31 <sup>11</sup> School of Health Sciences, Faculty of Medicine, Kagoshima University, 8-35-1,  
32 Sakuragaoka, Kagoshima, 890-8544, Japan.
- 33 <sup>12</sup> Department of Epidemiology for Community Health and Medicine, Kyoto Prefectural  
34 University of Medicine, 465 Kajii-cho, Kamigyō-ku, Kyoto, 602-8566, Japan.
- 35 <sup>13</sup> Laboratory of Public Health, Division of Nutritional Sciences, School of Food and  
36 Nutritional Sciences, University of Shizuoka, 52-1 Yada, Suruga-ku, Shizuoka, 422-8526,  
37 Japan.
- 38 <sup>14</sup> Department of Epidemiology for Community Health and Medicine, Kyoto Prefectural  
39 University of Medicine, 465 Kajii-cho, Kamigyō-ku, Kyoto, 602-8566, Japan.
- 40 <sup>15</sup> NCD Epidemiology Research Center, Shiga University of Medical Science, Seta-  
41 Tsukiwacho, Otsu, Shiga, 520-2192, Japan
- 42 <sup>16</sup> Department of Preventive Medicine and Public Health, Keio University School of  
43 Medicine, 35 Shinanomachi, Shinjuku-ku, Tokyo, 160-8582, Japan
- 44 <sup>17</sup> Department of Public Health, Shiga University of Medical Science, Seta Tsukiwacho, Otsu,  
45 Shiga, 520-2192, Japan
- 46 <sup>18</sup> Department of Preventive Medicine, Tokushima University Graduate School of Biomedical  
47 Sciences, 3-18-15 Kuramoto-cho, Tokushima, 770-8503, Japan.
- 48 <sup>19</sup> Division of Cancer Epidemiology and Prevention, Aichi Cancer Center, 1-1 Kanokoden,  
49 Chikusa-ku, Nagoya, Aichi, 464-8681, Japan.

50 <sup>20</sup> Department of Cancer Epidemiology, Nagoya University Graduate School of Medicine, 65  
51 Tsurumai-cho, Showa-ku, Nagoya, Aichi, 466-8550, Japan.

52

53 Short title: Diet diversity and metabolic syndrome in Japan

54

55 Address correspondence to:

56 Nobuaki Michihata, Cancer Prevention Center, Chiba Cancer Center Research Institute, 666-  
57 2 Nitona-cho, Chuo-ku, Chiba 260-8717, Japan

58 E-mail: nmichihata@chiba-cc.jp

59 Phone: +81-43-264-5431 (PHS:8543), facsimile: +81-43-265-4459

60

61 Word count

62 Abstract: 162 Words

63 Main text without references: 2567 Words

64 Total word count, including abstract and references: 3650 Words

65

## 66 **Authorship and contributions**

67 Conception and design: ZWH, NM1

68 Data acquisition: JO, HI, YN2, CS, TT, MN, YK, YT, AH, ST, DN, TK, EO, KK, NT, NM2,

69 SK, TW, KW, KM, J-MICC members

70 Analysis and interpretation of data; ZWH, NM1

71 Drafting the manuscript: ZWH

72 Revising the manuscript: NM1, YN1, YH, JO, HI, YN2, CS, TT, MN, YK, YT, AH, ST, DN,

73 TK, EO, KK, NT, NM2, SK, TW, KW, KM, J-MICC members

74

75 **Abstract**

76 **Background:** With the increasing burden of metabolic syndrome, it is crucial to focus on  
77 lifestyle interventions to reduce the risk. Diet is a modifiable factor that can reduce the risk of  
78 metabolic syndrome.

79 **Methods:** We examined the association between the dietary diversity score (DDS) and risk  
80 of metabolic syndrome using baseline data from the Japan Multi-Institutional Collaborative  
81 Cohort (J-MICC) study. In total, 75,332 participants were included in this study. A multiple  
82 logistic regression analysis was conducted to analyze the association between the DDS and  
83 metabolic syndrome.

84 **Results:** Inverse associations were observed between a high DDS and metabolic syndrome  
85 (adjusted odds ratio, 0.83 [95% confidential interval 0.76-0.92]). Likewise, a high DDS was  
86 associated with reduced odds of a high body mass index and hypertension. No significant  
87 associations were observed between the DDS and serum triglyceride, fasting blood glucose,  
88 or high-density lipoprotein cholesterol values.

89 **Conclusion:** To reduce the risk of metabolic syndrome, public health interventions should  
90 focus on promoting a diverse and balanced diet.

91

92 **Keywords:** dietary diversity score, food variety, nutritional adequacy

93

94 **List of Abbreviations**

95 aOR adjusted odds ratio

96 BMI body mass index

97 DDS dietary diversity score

98 J-MICC Japan Multi-institutional Collaborative Cohort Study

99 KOPS area Kyushu and Okinawa Population Study area

100 HDL-C high-density lipoprotein cholesterol

## 101 **Introduction**

102 Metabolic syndrome is a cluster of interconnected non-communicable diseases, including  
103 insulin resistance, obesity, dyslipidemia, low high-density serum cholesterol, and  
104 hypertension.<sup>1,2</sup> Metabolic syndrome is highly prevalent in both low- and high-income  
105 countries and is intricately linked with the incidence of cardiovascular diseases. According to  
106 the Global Burden of Disease Study 2019, stroke, cardiovascular diseases, and diabetes were  
107 the leading contributors of high disability-adjusted-life-years worldwide.<sup>3</sup> Furthermore, in  
108 Japan, the age-adjusted prevalence of metabolic syndrome was reported to be 19.3% in  
109 2005.<sup>4</sup>

110 Lifestyle modification is crucial in the management of metabolic syndrome. The  
111 dietary intake has a direct impact on metabolic risk factors. The intake of high-fiber, high-  
112 carbohydrate, and low-fat diets was reported to have positive effects on metabolic diseases.<sup>5</sup>  
113 A single-center study in Japan also reported that intake of vegetable-rich diets has an inverse  
114 association with the risk of metabolic syndrome.<sup>6</sup> A fast eating speed is reportedly associated  
115 with an increased risk of metabolic syndrome.<sup>7-9</sup> However, previous studies have mainly  
116 explored the content and quality of the food intake, with little research into dietary diversity.

117 The dietary diversity score (DDS) is a composite measure of the diet quality by  
118 counting the number of food groups consumed. Consumption of diverse food groups can also  
119 result in balanced nutrient intake<sup>10</sup> and thus can help reduce the risk of metabolic syndrome.  
120 The literature mainly explains the associations between DDS and the components of  
121 metabolic syndrome, such as obesity and diabetic conditions. However, inconsistent  
122 associations have been reported in different studies. Previous studies conducted among  
123 Iranian adolescents and adults reported a positive association between DDS and obesity.<sup>11,12</sup>  
124 However, another study in the UK reported inverse associations between DDS and diabetic  
125 incidence<sup>13</sup>. Similarly, a study in Korea also stated that DDS was associated with a reduced

126 likelihood of abdominal obesity and high triglyceride levels.<sup>14</sup> Such variations in findings  
127 might be due to small sample populations and differing study designs among previously  
128 conducted studies, resulting in inconclusive evidence.

129         The present study therefore explored the association between the DDS and risk of  
130 metabolic syndrome in a Japanese population.

131

## 132 **Methods**

### 133 *Study setting and participants*

134 Our study analyzed baseline data from the Japan Multi-institutional Collaborative Cohort (J-  
135 MICC) study (version.20210901 dataset). Baseline surveys were collected during 2005-2014  
136 at 14 different sites in Japan, including the Aichi Cancer Center, Chiba, Kanagawa,  
137 Takashima, Okazaki, Shizuoka-Daiko, Kyoto, Fukuoka, Saga, Kagoshima, Tokushima,  
138 Kyushu and Okinawa Population Study (KOPS) area, Shizuoka-Sakuragaoka, and Iga. The  
139 current study excluded the Aichi Cancer Center, Chiba, and Kanagawa data due to a lack of  
140 surveys on height, weight, blood tests, and other data necessary for defining metabolic  
141 syndrome.

142         Ethical approval was obtained from the ethics committee of the Aichi Cancer Center  
143 and each study site. Written informed consent was obtained from all participants. The details  
144 of the J-MICC study were reported in a previously published study profile.<sup>15</sup> Participants 35-  
145 69 years old were recruited, and information was collected via a structured questionnaire. In  
146 addition, peripheral blood samples and anthropometric measurements were collected at the  
147 time of enrollment.<sup>15</sup> The response rates at the study sites ranged from 19.7% to 69.8%.

148

### 149 *Study measurements*

- 150         • Dietary diversity assessments

151 Participants were administered a short food frequency questionnaire containing 47 items as  
152 part of the survey questions to obtain information on dietary habits.<sup>16,17</sup> The short food  
153 frequency questionnaire assessed the food intake frequency on an 8-point scale from "not at  
154 all" to "1 to 3 or more times per day." In this study, the food intake frequency was treated as a  
155 dichotomous variable of whether or not the participants consumed food "at least once a  
156 week". We classified foods into five major groups (bread and grains, vegetables, meat, dairy,  
157 and fruit) based on Kant et al.<sup>18</sup> To date, no universal definition of dietary diversity has been  
158 proposed. The DDS was calculated for each participant according to a counting approach that  
159 codes the intake frequency as 1 if the food group was consumed at least once a week and 0 if  
160 not.<sup>13,19</sup> The DDS categorizes diets into three groups (group 3 or less, group 4, or group 5)  
161 based on the number of the five food groups (bread and grains, vegetables, meat, dairy, and  
162 fruit) consumed. To understand the intake quantity in addition to the variety, we calculated  
163 the cumulative score of five food groups based on the numbers of items consumed in each  
164 food group as the DDS-2.<sup>20</sup> Each food group was assigned a maximum number of two, and  
165 the score was calculated by dividing the number of times a given item was consumed by the  
166 total number of items in each group. The obtained number was then multiplied by 2. A total  
167 score ranging from 0-10 was obtained by combining the five food groups, which were  
168 classified into four quantiles.<sup>20</sup>

169

- 170 • Metabolic syndrome assessments

171 We followed the criteria of the National Cholesterol Education Program Adult Treatment  
172 Panel III (NCEP-ATP III)<sup>21</sup> for the diagnosis of metabolic syndrome. Participants with  
173 biochemical data were diagnosed with metabolic syndrome if they met three of the following  
174 five conditions: 1) body mass index (BMI)  $\geq 25$  kg/m<sup>2</sup>; 2) systolic blood pressure  $\geq 130$   
175 mmHg and/or diastolic blood pressure  $\geq 85$  mmHg or the use of antihypertensive medication;



176 3) serum triglyceride level  $\geq 150$  mg/dL; 4) serum high-density lipoprotein cholesterol (HDL-  
177 C) level  $< 40$  mg/dL in men or  $< 50$  mg/dL in women; and 5) blood fasting glucose level  $\geq 100$   
178 mg/dL. Based on a previous study, the BMI was used instead of the waist circumference  
179 because waist circumference data were unavailable in the current study.<sup>22</sup>

180

- 181 • Other variables

182 The survey questions assessed the demographic characteristics (age, sex, years of education),  
183 lifestyle factors (physical activity, history of smoking, and drinking alcohol), and family  
184 history of hypertension and diabetes mellitus. Based on previous studies on metabolic  
185 syndrome, these variables were considered possible confounders.<sup>14,20</sup>

186

### 187 *Statistical analyses*

188 Descriptive analyses were conducted for each variable in order to understand their  
189 distribution. We also performed cross-tabulations and chi-square tests to understand the  
190 distribution of each variable with metabolic syndrome occurrence. To avoid underestimation,  
191 a multiple imputation method was applied when the number of missing observations  
192 exceeded 5% of the total observations.<sup>23</sup> This method utilizes a Markov chain Monte Carlo  
193 algorithm to generate 20 complete datasets by replacing missing values with a series of  
194 predicted values. Multiple imputation assumes that the data are randomly missing. The  
195 covariates included in the imputation were the age, sex, BMI, systolic blood pressure,  
196 diastolic blood pressure, triglyceride level, HDL-C level, fasting glucose level, smoking  
197 status, alcohol intake status, family history of hypertension, family history of diabetes, DDS,  
198 and DDS-2. The input generated 20 complete datasets. The results from each input dataset  
199 were combined into a single overall estimate and standard error using Rubin's law to reflect

200 the uncertainty associated with missing values. This method allows for a comprehensive  
201 analysis that accounts for potential variation due to missing data.<sup>23</sup>

202 We conducted multivariable logistic regression to obtain the risk estimates of  
203 metabolic syndrome in relation to the two types of DDS. The following variables were  
204 controlled for in both models as possible confounders: age, sex, years of education, history of  
205 smoking, alcohol consumption, and physical activity. The site variable was also included in  
206 the model to account for variations in the data collection at different centers. Analyses were  
207 repeated for stratification according to metabolic syndrome risk factors.

208 All analyses were conducted using the Stata statistical software program (17.1;  
209 StataCorp LLC, College Station, TX, USA). The threshold level was set to 5%.

210

## 211 **Results**

212 In total, 75,332 participants were included in the analysis. Table 1 shows the distribution of  
213 the participants. The majority (58.1%) of the population was  $\geq 55$  years old. More than half of  
214 the participants were women (55.3%). The average age of the study population was 55 years  
215 old. On average, 76.5% of the population engaged in physical exercise. The percentage of  
216 participants with a DDS of  $\leq 3$  was significantly higher in men (76.4%) than in women.  
217 Similar results were obtained for DDS-2, with the lowest quintile of DDS-2 predominantly  
218 comprising men (64.3%) (Supplementary Table S1).

219 Table 2 shows the distribution of the DDS and metabolic syndrome. Overall,  
220 metabolic syndrome was reported to be the highest among subjects 55-69 years old (66.3%)  
221 and men (60.7%). The distribution of metabolic syndrome among the study sites also varied,  
222 with the highest percentage reported in Saga (17.2%) and the lowest in Tokushima (2.0%).  
223 The distribution of the DDS among the five major food groups is reported in Supplementary  
224 Table S2. In the group with a DDS  $\leq 3$ , 97% and 37.6% of participants reported not eating

225 fruits and vegetables, respectively. Similarly, participants in the lowest quantile (quantile 1)  
226 of DDS-2 reported a reduced intake of fruits (66.7%) and dairy products (15.4%).

227 Table 3 presents the results of the multivariate logistic regression analysis. The total  
228 number of observations in this logistic regression model was imputed because more than  
229 28.3% of the observations were missing for education and fasting blood glucose variables.  
230 Participants with a high DDS were significantly less likely to have metabolic syndrome than  
231 those with lower values, as evidenced by an adjusted odds ratio (aOR) of 0.83 (95%  
232 confidence interval [CI] 0.76-0.92). A similar estimate was observed for the DDS-2, with the  
233 rate of metabolic syndrome being lowest among those in the highest DDS-2 quantile, as  
234 indicated by an aOR of 0.90 (95% CI 0.82-0.99). Similarly, we found that a high DDS was  
235 associated with a reduced occurrence of a high BMI (aOR 0.91 [95% CI 0.84-0.99]),  
236 hypertension (aOR 0.84 [95% CI 0.77-0.92]), and high serum triglyceride levels (aOR 0.90  
237 [95% CI 0.82-0.99]) (Supplementary Table S3). A similar pattern was observed for the DDS-  
238 2 and metabolic syndrome risk factors, except for high serum triglyceride levels  
239 (Supplementary Table S4). However, we found no association between the DDS and low  
240 HDL-C levels or high fasting glucose levels (Supplementary Tables S5 and S6). We also  
241 conducted stratification analyses by sex group; however, no effect modification was observed  
242 (Supplementary Tables S5 and S6).

243

## 244 **Discussion**

245 In this study, we collected data from various regions of Japan to examine the association  
246 between the DDS and metabolic syndrome. This is one of the few studies to focus on dietary  
247 diversity and metabolic syndrome risk factors in Japan. We found that the overall DDS had  
248 an inverse relationship with the risk of metabolic syndrome. We also found that a high DDS

249 was associated with a reduced likelihood of reporting a high BMI, hypertension, high serum  
250 triglyceride levels, and high fasting blood glucose levels.

251 Both a high DDS and high DDS-2 were associated with a reduced likelihood of  
252 reporting metabolic syndrome. Our findings were consistent with those of a previous study in  
253 a Korean population, in which a lower risk of metabolic syndrome and its risk factors were  
254 reported in the higher DDS group than in the lower DDS group.<sup>14</sup> This supports our  
255 hypothesis that a diverse diet is a protective factor against the risk of metabolic syndrome.  
256 The underlying assumption for the current finding is that dietary diversity is highly associated  
257 with the consumption of a balanced and adequate diet.<sup>24</sup> Our study also showed that those in  
258 the diverse diet groups were more likely to consume fruits and vegetables than others. Our  
259 descriptive analyses revealed that men had a higher percentage of lower DDS scores than did  
260 women. This observation aligns with previous studies conducted in China and Australia,<sup>25,26</sup>  
261 which also reported higher meat consumption among men than among women. These  
262 findings emphasize the need to prioritize the male population when promoting dietary  
263 diversity, warranting increased attention, and targeted interventions. In our study, we  
264 compared the risk estimates of the two DDS indicators, with the second indicator considering  
265 the cumulative index of dietary diversity. However, since the risk estimates were similar for  
266 both DDS indicators, we were unable to determine whether or not consuming a wide range of  
267 food groups within a single food category was particularly advantageous for health.

268 Analyses of metabolic syndrome risk factors also showed that a high DDS was  
269 associated with a reduced likelihood of reporting hypertension and high serum triglyceride  
270 levels. The finding that DDS is associated with a reduced likelihood of hypertension was  
271 supported by a previous study,<sup>27</sup> which reported that DDS was inversely associated with  
272 serum triglyceride levels and systolic blood pressure. In addition to the carbohydrate intake,  
273 the meat intake was also reported to be associated with the risk of peripheral

274 atherosclerosis.<sup>28</sup> Furthermore, low-carbohydrate diets and calorie restriction have been  
275 reported to be effective interventions in reducing serum triglyceride levels.<sup>29</sup> Similar to our  
276 findings, a previous Japanese study reported that greater dietary diversity was associated with  
277 the more frequent consumption of fiber in the diet,<sup>30</sup> which can be a possible explanation to  
278 reduced serum triglyceride concentrations, thereby leading to a preventive effect.

279 In addition, we found that a higher DDS was associated with a reduced risk of  
280 reporting a high BMI. One underlying assumption is that a higher DDS is associated with a  
281 lower consumption of a carbohydrate-rich diet, which is the main factor leading to obesity.<sup>31</sup>  
282 However, contrary to our findings, a previous systematic review reported no associations  
283 between the DDS and BMI.<sup>32</sup> Similarly, another systematic review reported no conclusive  
284 evidence concerning the DDS and obesity associations.<sup>19</sup> These diverse associations might be  
285 related to different cultural aspects of the involved participants. In our study, we investigated  
286 the associations by comparing the two DDS scores, and the results from both scores were  
287 consistent, indicating that consuming a diverse diet is advantageous for BMI management.

288 Our study had several strengths and limitations. This study offers a comprehensive  
289 evaluation of dietary diversity in the Japanese population by employing two different  
290 approaches to define the DDS. The findings from both approaches are comparable, revealing  
291 a consistent association between increased dietary diversity and a decreased risk of metabolic  
292 syndrome. In addition, our study incorporated a substantial sample size, which enhanced the  
293 reliability and statistical power of our findings. However, this study was an analysis of  
294 baseline cross-sectional data, and because of the nature of the cross-sectional study, we were  
295 unable to establish causal relationships. Although we controlled for educational status and  
296 basic demographic characteristics in our model, we were unable to control for the wealth  
297 index of the study population, which might have resulted in residual confounding. In addition,  
298 a self-reported questionnaire was used to collect data on dietary factors, the history of

299 smoking, drinking, physical exercise, and the family history, so there was a possibility of  
300 inevitable misclassification or measurement error. This might have led to the underestimation  
301 of true associations, with the estimates biased towards the null hypothesis. Despite the  
302 potential for misclassification or measurement errors due to the use of self-reported  
303 questionnaires, our findings were relatively uninfluenced, as we identified significant  
304 associations.

305 Our findings revealed variations in site-specific risks for the association between DDS  
306 and metabolic syndrome. Further exploration of the prefectural-level economic situation and  
307 other possible influencing factors is recommended to explain such variations. This study did  
308 not explore the determinants of dietary diversity in the Japanese population, so further studies  
309 are recommended to determine policy interventions to implement and promote dietary  
310 diversity.

311

## 312 **Conclusion**

313 In conclusion, our study found that consumption of a diverse range of foods was associated  
314 with a reduced risk of metabolic syndrome and its associated risk factors. To mitigate the risk  
315 of metabolic syndrome in the Japanese population, it is advisable to avoid restricting food  
316 intake to specific groups. Instead, promoting a varied and balanced diet may be  
317 recommended as a preventive measure against metabolic syndrome risk factors.

318

## 319 **Sources of funding**

320 This study was supported by Grants-in-Aid for Scientific Research for Priority Areas of  
321 Cancer (No.17015018), Innovative Areas (No.221S0001), and Platform of Supporting Cohort  
322 Study and Biospecimen Analysis (Japan Society for the Promotion of Science [JSPS])

323 KAKENHI Grants No.16H06277 and 22H04923 [CoBiA]) from the Japanese Ministry of  
324 Education, Culture, Sports, Science, and Technology.

325

### 326 **Acknowledgements**

327 We would like to thank the participants of the J-MICC study for providing the necessary  
328 information to conduct the current research.

329

### 330 **Disclosures**

331 The authors declare no conflict of interests.

332

### 333 **Supplementary Materials**

334 Tables S1-S6

## 335 **References**

- 336 1. Saklayen MG. The global epidemic of the metabolic syndrome. *Curr Hypertens Rep.*  
337 2018;20. doi:10.1007/S11906-018-0812-Z
- 338 2. Kassi E, Pervanidou P, Kaltsas G, Chrousos G. Metabolic syndrome: definitions and  
339 controversies. *BMC Med.* 2011;9:1-13. doi:10.1186/1741-7015-9-48/TABLES/2
- 340 3. Abbafati C, Abbas KM, Abbasi-Kangevari M, et al. Global burden of 369 diseases and  
341 injuries in 204 countries and territories, 1990–2019: a systematic analysis for the Global  
342 Burden of Disease Study 2019. *The Lancet.* 2020;396(10258):1204-1222.  
343 doi:10.1016/S0140-6736(20)30925-9
- 344 4. Liu L, Miura K, Fujiyoshi A, et al. Impact of metabolic syndrome on the risk of  
345 cardiovascular disease mortality in the United States and in Japan. *American Journal of*  
346 *Cardiology.* 2014;113:84-89. doi:10.1016/j.amjcard.2013.08.042
- 347 5. Calton EK, James AP, Pannu PK, Soares MJ. Certain dietary patterns are beneficial for  
348 the metabolic syndrome: reviewing the evidence. *Nutrition Research.* 2014;34:559-568.  
349 doi:10.1016/J.NUTRES.2014.06.012
- 350 6. Bahari T, Uemura H, Katsuura-Kamano S, et al. Nutrient-derived dietary patterns and  
351 their association with metabolic syndrome in a Japanese population. *J Epidemiol.*  
352 2018;28:194. doi:10.2188/JEA.JE20170010
- 353 7. Garcidueñas-Fimbres TE, Paz-Graniel I, Nishi SK, Salas-Salvadó J, Babio N. Eating  
354 speed, eating frequency, and their relationships with diet quality, adiposity, and metabolic  
355 syndrome, or its components. *Nutrients.* 2021;13. doi:10.3390/NU13051687
- 356 8. Nanri A, Miyaji N, Kochi T, Eguchi M, Kabe I, Mizoue T. Eating speed and risk of  
357 metabolic syndrome among Japanese workers: the Furukawa Nutrition and Health Study.  
358 *Nutrition.* 2020;78:110962. doi:10.1016/J.NUT.2020.110962



- 359 9. Zhu B, Haruyama Y, Muto T, Yamazaki T. Association between eating speed and  
360 metabolic syndrome in a three-year population-based cohort study. *J Epidemiol.*  
361 2015;25:332. doi:10.2188/JEA.JE20140131
- 362 10. Kennedy GL, Pedro MR, Seghieri C, Nantel G, Brouwer I. Dietary diversity score is a  
363 useful indicator of micronutrient intake in non-breast-feeding Filipino children. *J Nutr.*  
364 2007;137:472-477. doi:10.1093/JN/137.2.472
- 365 11. Karimbeiki R, Pourmasoumi M, Feizi A, et al. Higher dietary diversity score is  
366 associated with obesity: a case-control study. *Public Health.* 2018;157:127-134.  
367 doi:10.1016/j.puhe.2018.01.028
- 368 12. Golpour-Hamedani S, Rafie N, Pourmasoumi M, Saneei P, Safavi SM. The association  
369 between dietary diversity score and general and abdominal obesity in Iranian children  
370 and adolescents. *BMC Endocr Disord.* 2020;20:1-8. doi:10.1186/S12902-020-00662-  
371 W/TABLES/4
- 372 13. Conklin AI, Monsivais P, Khaw KT, Wareham NJ, Forouhi NG. Dietary diversity, diet  
373 cost, and incidence of type 2 diabetes in the United Kingdom: a prospective cohort study.  
374 *PLoS Med.* 2016;13. doi:10.1371/JOURNAL.PMED.1002085
- 375 14. Kim J, Kim M, Shin Y, Cho JH, Lee D, Kim Y. Association between dietary diversity  
376 score and metabolic syndrome in Korean adults: a community-based prospective cohort  
377 study. *Nutrients.* 2022;14. doi:10.3390/NU14245298/S1
- 378 15. Takeuchi K, Naito M, Kawai S, et al. Study profile of the Japan Multi-institutional  
379 Collaborative Cohort (J-MICC) Study. *J Epidemiol.* 2021;31:660-668.  
380 doi:10.2188/JEA.JE20200147
- 381 16. Tokudome S, Ikeda M, Tokudome Y, Imaeda N, Kitagawa I, Fujiwara N. Development of  
382 data-based semi-quantitative food frequency questionnaire for dietary studies in middle-  
383 aged Japanese. *Jpn J Clin Oncol.* 1998;28:679-687. doi:10.1093/jjco/28.11.679

- 384 17. Tokudome Y, Goto C, Imaeda N, et al. Relative validity of a short food frequency  
385 questionnaire for assessing nutrient intake versus three-day weighed diet records in  
386 middle-aged Japanese. *J Epidemiol.* 2005;15:135. doi:10.2188/JEA.15.135
- 387 18. Kant AK, Schatzkin A, Harris TB, Ziegler RG, Block G. Dietary diversity and  
388 subsequent mortality in the First National Health and Nutrition Examination Survey  
389 Epidemiologic Follow-up Study. *Am J Clin Nutr.* 1993;57:434-440.  
390 doi:10.1093/AJCN/57.3.434
- 391 19. de Oliveira Otto MC, Anderson CAM, Dearborn JL, et al. Dietary diversity: implications  
392 for obesity prevention in adult populations: a science advisory from the American Heart  
393 Association. *Circulation.* 2018;138:e160. doi:10.1161/CIR.0000000000000595
- 394 20. Azadbakht L, Mirmiran P, Esmailzadeh A, Azizi F. Dietary diversity score and  
395 cardiovascular risk factors in Tehranian adults. *Public Health Nutr.* 2006;9:728-736.  
396 doi:10.1079/PHN2005887
- 397 21. Grundy SM, Cleeman JI, Daniels SR, et al. Diagnosis and management of the metabolic  
398 syndrome. *Circulation.* 2005;112:2735-2752.  
399 doi:10.1161/CIRCULATIONAHA.105.169404
- 400 22. Van Nguyen T, Arisawa K, Katsuura-Kamano S, et al. Associations of metabolic  
401 syndrome and metabolically unhealthy obesity with cancer mortality: The Japan Multi-  
402 Institutional Collaborative Cohort (J-MICC) study. *PLoS One.* 2022;17:e0269550.  
403 doi:10.1371/JOURNAL.PONE.0269550
- 404 23. Li P, Stuart EA, Allison DB. Multiple imputation: a flexible tool for handling missing  
405 data. *JAMA.* 2015;314:1966. doi:10.1001/JAMA.2015.15281
- 406 24. Oldewage-Theron WH, Kruger R. Food variety and dietary diversity as indicators of the  
407 dietary adequacy and health status of an elderly population in Sharpeville, South Africa. *J*  
408 *Nutr Elder.* 2008;27:101-133. doi:10.1080/01639360802060140

- 409 25. Tian X, Wu M, Zang J, Zhu Y, Wang H. Dietary diversity and adiposity in Chinese men  
410 and women: an analysis of four waves of cross-sectional survey data. *European Journal*  
411 *of Clinical Nutrition* 2017 71:4. 2016;71(4):506-511. doi:10.1038/ejcn.2016.212
- 412 26. Xu X, Inglis SC, Parker D. Sex differences in dietary consumption and its association  
413 with frailty among middle-aged and older Australians: a 10-year longitudinal survey.  
414 *BMC Geriatr.* 2021;21(1):1-12. doi:10.1186/S12877-021-02165-2/TABLES/4
- 415 27. Farhangi MA, Jahangiry L. Dietary diversity score is associated with cardiovascular risk  
416 factors and serum adiponectin concentrations in patients with metabolic syndrome. *BMC*  
417 *Cardiovasc Disord.* 2018;18:1-6. doi:10.1186/S12872-018-0807-3/FIGURES/1
- 418 28. Ogilvie RP, Lutsey PL, Heiss G, Folsom AR, Steffen LM. Dietary intake and peripheral  
419 arterial disease incidence in middle-aged adults: the Atherosclerosis Risk in  
420 Communities (ARIC) Study. *Am J Clin Nutr.* 2017;105:651.  
421 doi:10.3945/AJCN.116.137497
- 422 29. Luna-Castillo KP, Olivares-Ochoa XC, Hernández-Ruiz RG, et al. The effect of dietary  
423 interventions on hypertriglyceridemia: from public health to molecular nutrition  
424 evidence. *Nutrients.* 2022;14. doi:10.3390/NU14051104
- 425 30. Otsuka R, Tange C, Nishita Y, et al. Dietary diversity and all-Cause and cause-specific  
426 mortality in Japanese community-dwelling older adults. *Nutrients.* 2020;12.  
427 doi:10.3390/NU12041052
- 428 31. Miyamoto K, Kawase F, Imai T, Sezaki A, Shimokata H. Dietary diversity and healthy  
429 life expectancy—an international comparative study. *European Journal of Clinical*  
430 *Nutrition* 2018 73:3. 2018;73:395-400. doi:10.1038/s41430-018-0270-3
- 431 32. Salehi-Abargouei A, Akbari F, Bellissimo N, Azadbakht L. Dietary diversity score and  
432 obesity: a systematic review and meta-analysis of observational studies. *European*  
433 *Journal of Clinical Nutrition* 2016 70:1. 2015;70:1-9. doi:10.1038/ejcn.2015.118

434 Table 1. Basic characteristics of participants and distribution of the dietary diversity score

| Variables                                     | Total<br>N=75,332 | Dietary diversity score |               |               | p-value |
|-----------------------------------------------|-------------------|-------------------------|---------------|---------------|---------|
|                                               |                   | ≤3<br>N=2,781           | 4<br>N=18,394 | 5<br>N=54,147 |         |
| Age, n (%)                                    |                   |                         |               |               | <0.001  |
| 35-44 years                                   | 12,205 (16.2)     | 556 (20.0)              | 4,404 (23.9)  | 7,245 (13.4)  |         |
| 45-54 years                                   | 19,374 (25.7)     | 820 (29.5)              | 5,616 (30.5)  | 12,938 (23.9) |         |
| 55-69 years                                   | 43,753 (58.1)     | 1,405 (50.5)            | 8,374 (45.5)  | 33,974 (62.7) |         |
| Gender, n (%)                                 |                   |                         |               |               | <0.001  |
| Female                                        | 41,694 (55.3)     | 655 (23.6)              | 7,832 (42.6)  | 33,207 (61.3) |         |
| Male                                          | 33,638 (44.7)     | 2,126 (76.4)            | 10,562 (57.4) | 20,950 (38.7) |         |
| Body mass index, mean (SD), kg/m <sup>2</sup> | 23.1 (3.3)        | 23.50 (3.5)             | 23.2 (3.4)    | 23.0 (3.3)    | <0.001  |
| Systolic blood pressure, mean (SD), mmHg      | 127.8 (20.0)      | 129.9 (19.8)            | 127.7 (20.0)  | 127.8 (20.0)  | <0.001  |
| Diastolic blood pressure, mean (SD), mmHg     | 78.0 (12.1)       | 80.24 (12.1)            | 78.5 (12.4)   | 77.8 (12.0)   | <0.001  |
| Triglycerides, mean (SD), mg/dL               | 125.1 (98.0)      | 141.10 (120.3)          | 130.6 (108.3) | 122.4 (92.8)  | <0.001  |
| HDL-C, mean (SD), mg/dL                       | 63.4 (16.6)       | 59.84 (16.6)            | 62.5 (16.8)   | 63.9 (16.6)   | <0.001  |
| Fasting glucose, mean (SD), mg/dL             | 98.0 (21.0)       | 100.62 (22.8)           | 98.1 (21.3)   | 97.8 (20.8)   | <0.001  |
| Smoking status, n (%)                         |                   |                         |               |               | <0.001  |
| Current                                       | 12,883 (17.2)     | 1,024 (37.0)            | 5,014 (27.4)  | 6,845 (12.7)  |         |
| Past                                          | 16,455 (21.9)     | 846 (30.6)              | 4,749 (26.0)  | 10,860 (20.1) |         |
| Never                                         | 45,631 (60.9)     | 897 (32.4)              | 8,531 (46.6)  | 36,203 (67.2) |         |
| Drinking status, n (%)                        |                   |                         |               |               | <0.001  |
| Current                                       | 40,635 (54.0)     | 1,942 (69.9)            | 11,590 (63.1) | 27,103 (50.1) |         |
| Past                                          | 1,925 (2.6)       | 91 (3.3)                | 468 (2.5)     | 1,366 (2.5)   |         |
| Never                                         | 32,686 (43.4)     | 746 (26.8)              | 6,316 (34.4)  | 25,624 (47.4) |         |
| Regular physical exercise, n (%)              | 57,647 (76.5)     | 1,758 (63.3)            | 12,729 (69.4) | 42,692 (79.0) | <0.001  |
| Years of education, n (%)                     |                   |                         |               |               | <0.001  |
| ≤9                                            | 5,613 (10.4)      | 373 (15.0)              | 1,457 (10.7)  | 3,783 (10.0)  |         |
| 10-15                                         | 23,152 (42.9)     | 1,151 (46.2)            | 6,026 (44.1)  | 15,975 (42.2) |         |
| ≥16                                           | 25,030 (46.4)     | 956 (38.4)              | 6,131 (44.9)  | 17,943 (47.4) |         |
| Unknown                                       | 201 (0.4)         | 11 (0.4)                | 52 (0.4)      | 138 (0.4)     |         |
| History of hypertension, n (%)                | 34,146 (46.9)     | 1,342 (51.2)            | 8,201 (46.5)  | 24,603 (46.8) | <0.001  |
| Family history, n (%)                         |                   |                         |               |               |         |
| Hypertension                                  | 33,300 (47.7)     | 1,132 (45.6)            | 8,031 (47.7)  | 24,137 (47.8) | <0.001  |
| Diabetes                                      | 12,789 (18.3)     | 479 (19.1)              | 3,302 (19.6)  | 9,008 (17.8)  | <0.001  |

435 SD: standard deviation; HDL-C: high-density lipoprotein cholesterol

436 Table 2. Distributions of the dietary diversity score and metabolic syndrome

| Variables                 | Metabolic syndrome |               | p-value |
|---------------------------|--------------------|---------------|---------|
|                           | Yes, n (%)         | No, n (%)     |         |
| Dietary diversity score   |                    |               | < 0.001 |
| ≤3                        | 549 (4.8)          | 2,232 (3.5)   |         |
| 4                         | 2,980 (26.2)       | 15,414 (24.1) |         |
| 5                         | 7,847 (69.0)       | 46,310 (72.4) |         |
| Age                       |                    |               | < 0.001 |
| 35-44 years               | 1,086 (9.6)        | 11,119 (17.4) |         |
| 45-54 years               | 2,743 (24.1)       | 16,631 (26.0) |         |
| 55-69 years               | 7,547 (66.3)       | 36,206 (56.6) |         |
| Gender                    |                    |               | < 0.001 |
| Female                    | 4,466 (39.3)       | 37,228 (58.2) |         |
| Male                      | 6,910 (60.7)       | 26,728 (41.8) |         |
| Years of education        |                    |               | < 0.001 |
| ≤9                        | 1,128 (14.6)       | 4,485 (9.7)   |         |
| 10-15                     | 3,428 (44.3)       | 19,724 (42.6) |         |
| ≥16                       | 3,150 (40.7)       | 21,880 (47.3) |         |
| Unknown                   | 34 (0.4)           | 167 (0.4)     |         |
| Smoking status            |                    |               | < 0.001 |
| Never                     | 5,734 (50.6)       | 39,897 (62.7) |         |
| Past                      | 3,253 (28.7)       | 13,202 (20.8) |         |
| Current                   | 2,348 (20.7)       | 10,535 (16.6) |         |
| Drinking status           |                    |               | < 0.001 |
| Never                     | 4,602 (40.5)       | 28,084 (44.0) |         |
| Past                      | 343 (3.0)          | 1,582 (2.5)   |         |
| Current                   | 6,413 (56.5)       | 34,222 (53.6) |         |
| Regular physical exercise |                    |               | < 0.001 |
| No                        | 2,931 (25.8)       | 15,046 (23.6) |         |
| Yes                       | 8,410 (74.2)       | 48,769 (76.4) |         |
| Site                      |                    |               | < 0.001 |
| Takashima                 | 460 (4.0)          | 3,065 (4.8)   |         |
| Okazaki                   | 982 (8.6)          | 5,568 (8.7)   |         |
| Shizuoka-Daiko            | 968 (8.5)          | 9,189 (14.4)  |         |
| Kyoto                     | 917 (8.1)          | 5,276 (8.3)   |         |
| Fukuoka                   | 1,444 (12.7)       | 8,649 (13.5)  |         |
| Saga                      | 1,953 (17.2)       | 10,115 (15.8) |         |
| Kagoshima                 | 1,572 (13.8)       | 6,066 (9.5)   |         |
| Tokushima                 | 222 (2.0)          | 2,218 (3.5)   |         |
| KOPS area                 | 1,948 (17.1)       | 7,782 (12.2)  |         |
| Shizuoka-Sakuragaoka      | 680 (6.0)          | 4,837 (7.6)   |         |
| Iga                       | 230 (2.0)          | 1,191 (1.9)   |         |

437

438 Table 3. Associations between dietary diversity scores and metabolic syndrome

| Variables    | Multivariable logistic regression |                 |
|--------------|-----------------------------------|-----------------|
|              | aOR (95% CI)*                     | <i>p</i> -value |
| <b>DDS</b>   |                                   |                 |
| ≤ 3          | Reference                         |                 |
| 4            | 0.88 (0.80-0.97)                  | 0.013           |
| 5            | 0.83 (0.76-0.92)                  | < 0.001         |
| <b>DDS-2</b> |                                   |                 |
| Quantile 1   | Reference                         |                 |
| Quantile 2   | 0.98 (0.92-1.03)                  | 0.359           |
| Quantile 3   | 0.92 (0.87-0.98)                  | 0.005           |
| Quantile 4   | 0.91 (0.84-0.98)                  | 0.011           |

439 aOR: adjusted odds ratio, CI: confidence interval, DDS: dietary diversity score

440 \*Adjusted for the age, sex, years of education, smoking status, drinking status, regular

441 physical exercise, and site
